# Supplementary material for: Platelet-rich plasma respectively reduces and promotes adipogenic and myofibroblastic differentiation of human adipose-derived stromal cells via the TGFβ signalling pathway
Source: PubMed Central journal article supplement (PMC5462784; doi:10.1038/s41598-017-03113-0), 2017-06-07
Supplement: 41598_2017_3113_MOESM1_ESM.pdf [file 41598_2017_3113_MOESM1_ESM.pdf]

## Platelet-rich plasma respectively reduces and promotes adipogenic and myofibroblastic differentiation of human adipose-derived stromal cells via the TGF $\beta$ signalling pathway

Bérengère Chignon-Sicard<sup>1,2</sup>, Magali Kouidhi<sup>1</sup>, Xi Yao<sup>1</sup>, Audrey Delerue-Audegond<sup>3</sup>, Phi Villageois<sup>1</sup>, Pascal Peraldi<sup>1</sup>, Patricia Ferrari<sup>4</sup>, Yves Rival<sup>2</sup>, David Piwnica<sup>3</sup>, Jérôme Aubert<sup>3</sup> and Christian Dani<sup>1\*</sup>

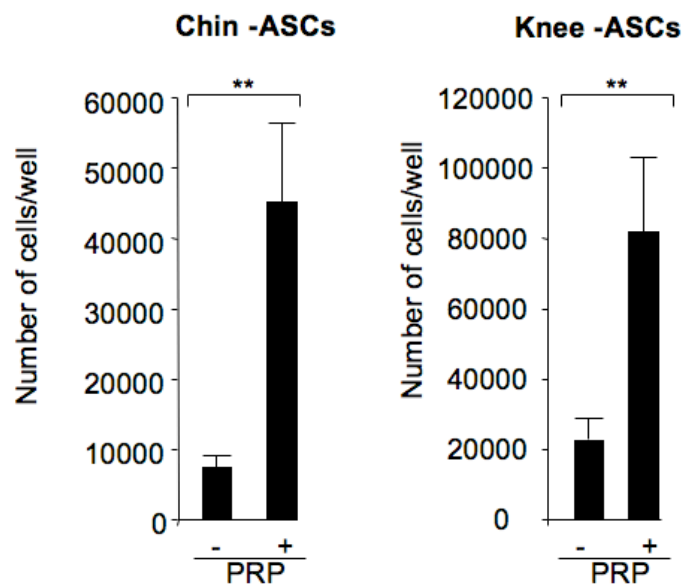

**Fig. S1: Platelet-rich plasma (PRP) promotes proliferation of adipose-derived stromal cells from paired chin or knee fat sites**

Adipose-derived stromal cells were isolated from paired chin and knee paired fat tissues and expanded *ex vivo*. Cells were seeded and 24h hours after cells were maintained in the absence or presence of 20% PRP. The cell number was counted after 72 h. The values were significantly different ( $p < 0.01$ ,  $n = 5$  individual PRP).

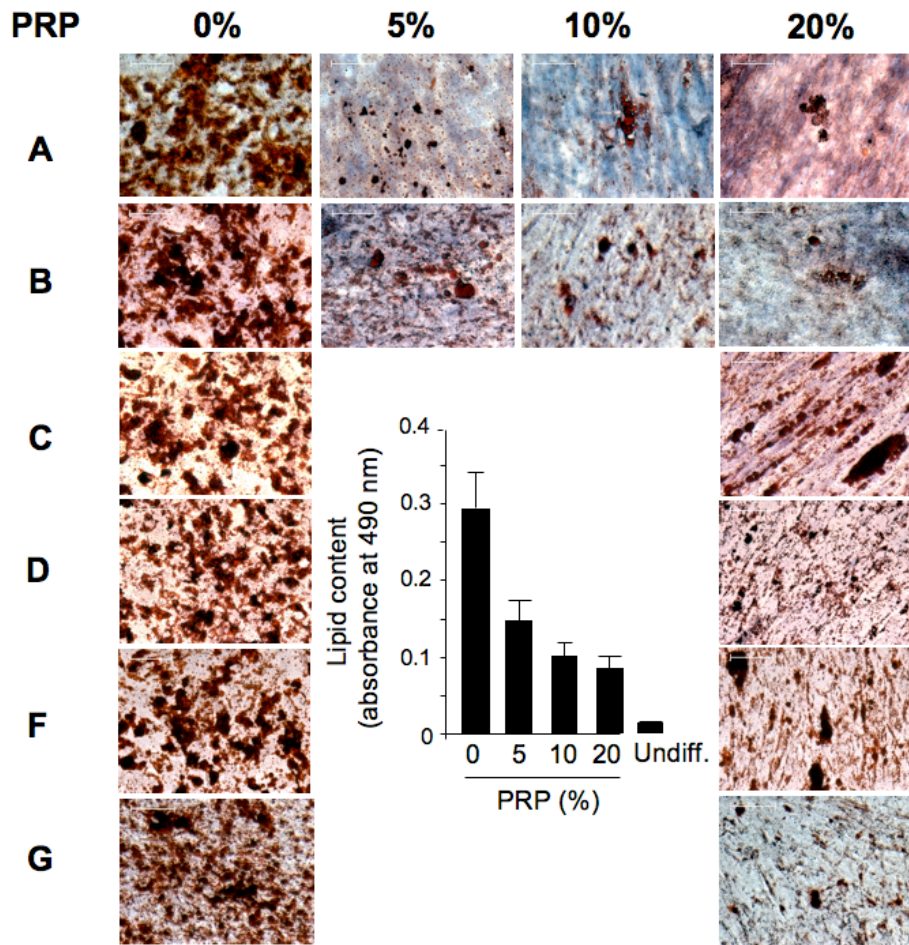

**Fig. S2: Effect of individual PRPs on ASC adipocyte differentiation.**

Knee-ASCs were induced to undergo adipocyte differentiation in the presence of 5%, 10% or 20% of PRP A and B; and of 20% of other PRPs. After 10 days, cells were fixed and stained with oil red-O to visualize lipid droplets. Images were recorded, then lipid content was measured by quantification of oil red-O staining. Data are the mean of 2 independent experiments (PRP A and PRP B).

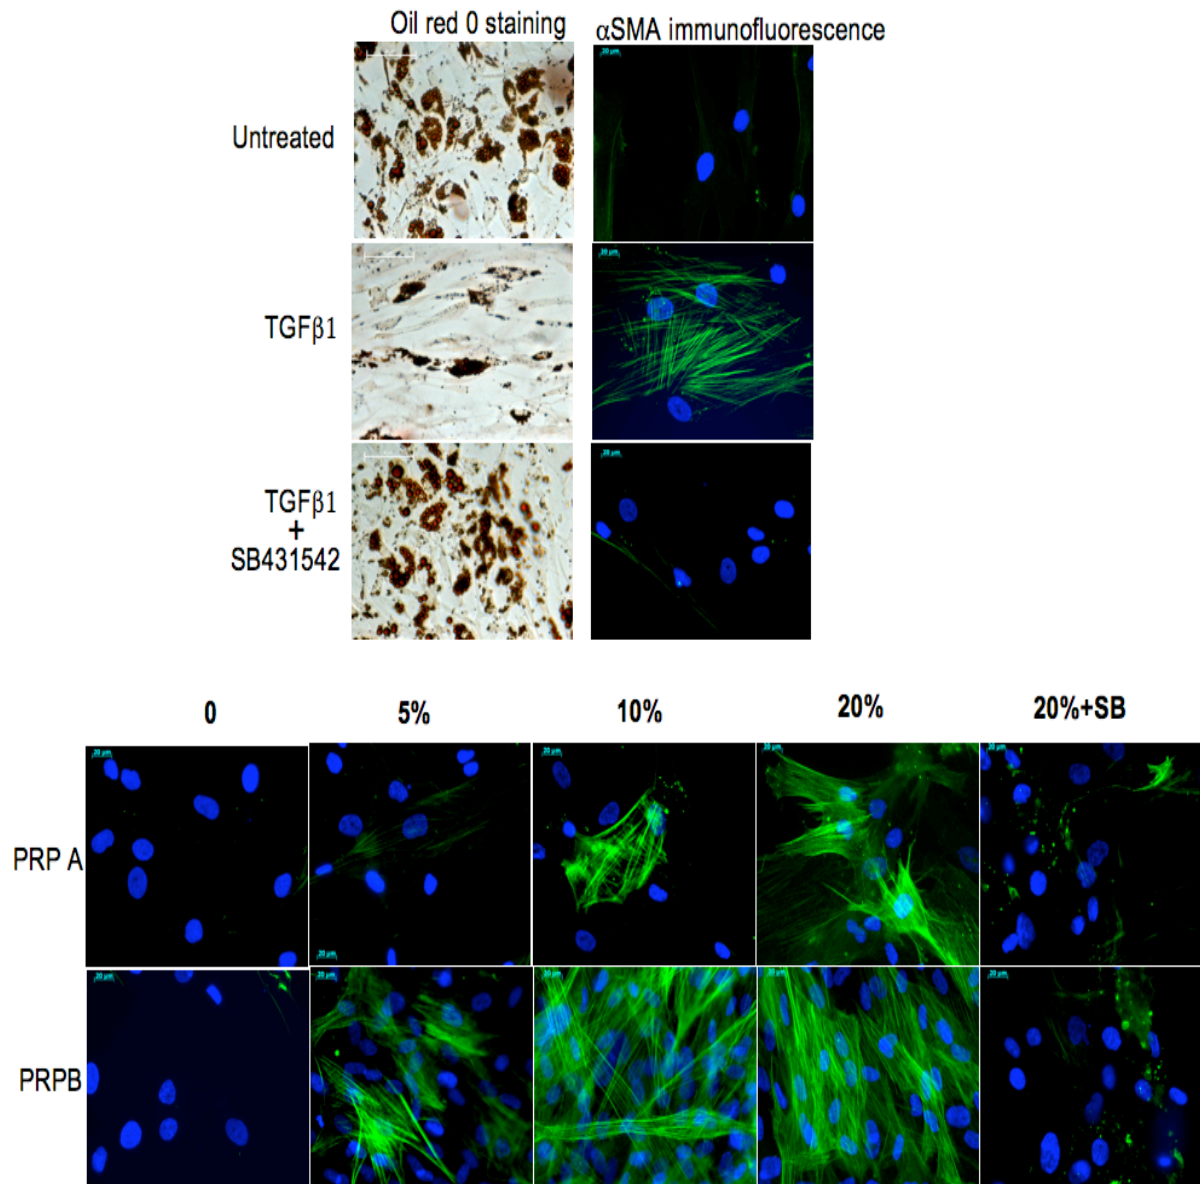

**Fig. 3S :Regulation of adipogenic and myfibroblastic differentiations by TGFb1 and PRP is reversed by SB431542.**

Upper panel: ASCs (hMADScs) were induced to undergo adipocyte differentiation in the presence of 2 ng/ml TGF $\beta$ 1 in the absence or presence of 5  $\mu$ M SB431542. After 10 days, cells were fixed and stained with oil red-O for adipogenic differentiation (left panel) and staining for aSMA expression by immunofluorescence for myofibroblastic differentiation (right panel).

Lower panel: ASCs (hMADScs) were induced to undergo adipocyte differentiation in the presence of different concentrations of indicated PRPs in the absence or presence of 5  $\mu$ M SB431542. After 10 days cells were stained for  $\alpha$ SMA expression by immunofluorescence.

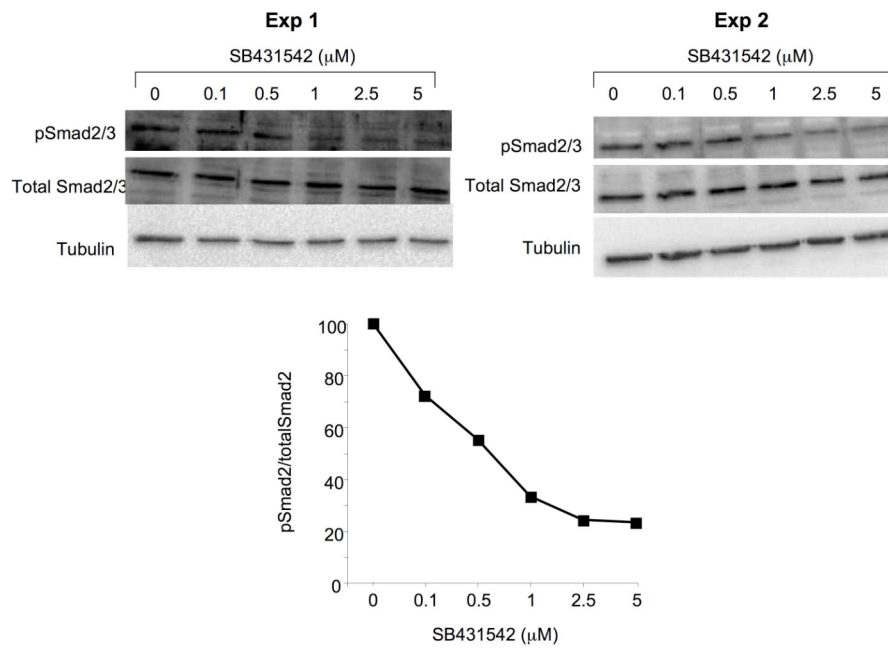

**Fig.S4: Inhibition of TGF $\beta$ -induced Smad 2/3 activation by SB431542.**

ASCs were stimulation for 30 min with 5 ng/ml of TGF $\beta$ 1 in the presence of different SB431542 concentrations. Then, phospho Smad2/3 was analyzed by Western-blot. Two experiments are shown (upper part). Then, the pSmad 2/3 signals were corrected by the total Smad signals and the condition TGF $\beta$  in the absence of SB431542 was taken as 100 for pSmad2/3 signal quantification (lower part).

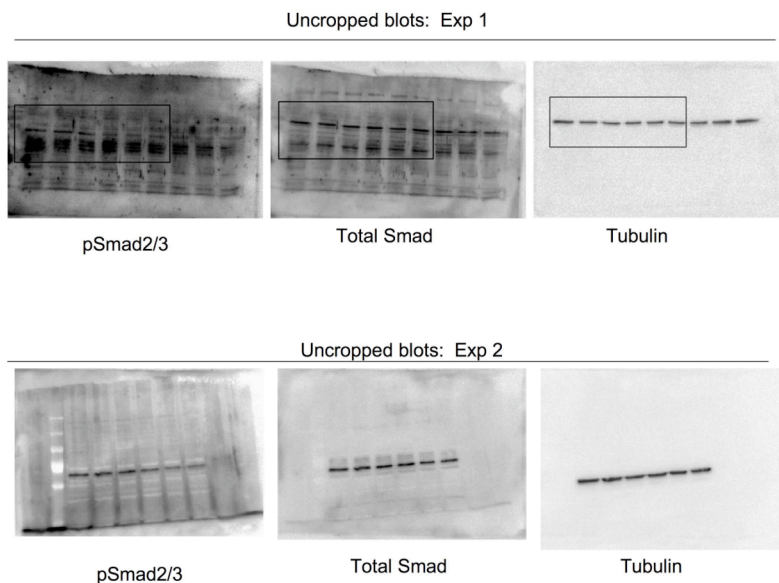

**Full-length blots of Fig.S4**

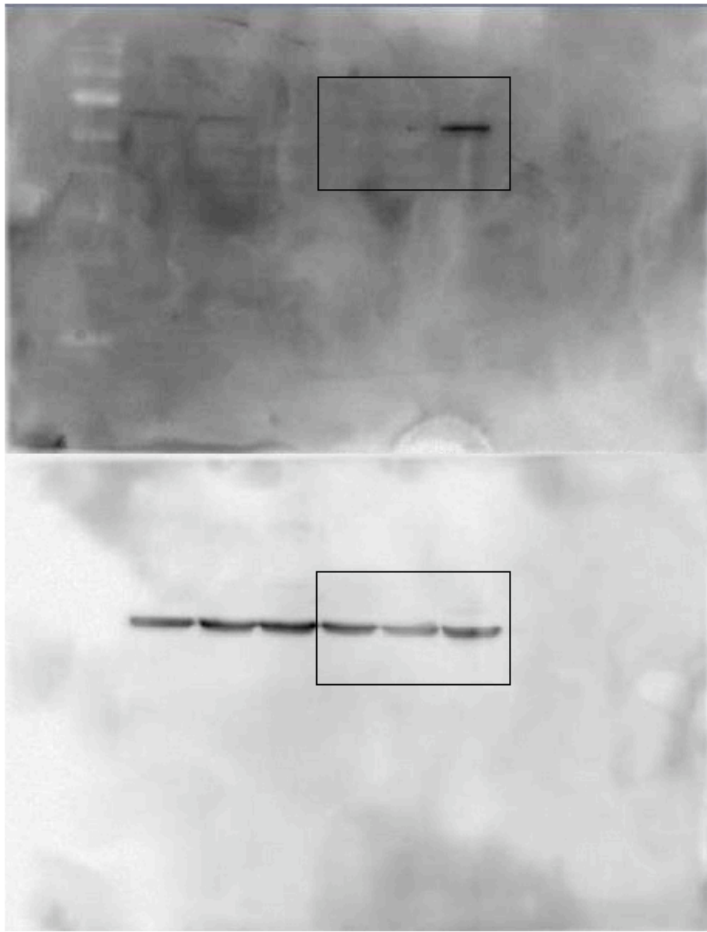

**Fig. S5: Full-length blots of the main figure 3.**

| <b>Factors</b> | <b>Concentration (ng/ml)</b> | <b>±SEM</b> | <b>Number of PRP tested</b> |
|----------------|------------------------------|-------------|-----------------------------|
| IGFBP3         | 1937                         | 204         | 6                           |
| Leptin         | 9.88                         | 2.28        | 6                           |
| PDGF-AA        | 1671                         | 292         | 4                           |
| TGF β1         | 8.4                          | 1.7         | 6                           |

**Table 1: Quantification of factors released from PRP.**

IGFBP3, PDGF-AA, TGFβ1 and leptin were quantified by ELISA. The number of PRPs analyzed are indicated.
